# Supplementary material
Source: PubMed Central journal article supplement (PMC2517133)
Supplement: NIHMS61165-supplement-si20060225_113.pdf [file NIHMS61165-supplement-si20060225_113.pdf]

Table S1. pKa Values Calculated for Resonances with pH Dependant Chemical Shifts.

Given in this table are the pKa values calculated for pH dependant resonances in the given peptides, dominant pKas and c values are highlighted in light gray. The value  $c_i$  is the fraction of the total chemical shift displacement contributed by the  $i$ th titration event (having pKa <sub>$i$</sub> ). The acidic amino acids in the sequence are color matched to their corresponding pKa's in other resonances they affect. The total chemical shift change during the titration for each resonance is given in the column labeled  $\Delta\delta$  (ppm). For each peptide, the activity on NPR-1 is given as a percent of the measured activity of EMPGVLRN-NH<sub>2</sub>. Only sufficiently resolved backbone amide resonances with a total chemical shift change of greater than 0.02 ppm were included in this table. (Table on next page)

\* = Chemical shift changed directions during pH titration; \*\* = "1" being the farthest downfield of two similar protons.

| Peptide                                                                      | Peak            | $\Delta\delta$ (ppm) | pKa <sub>1</sub>   | c <sub>1</sub>     | pKa <sub>2</sub>   | c <sub>2</sub> |
|------------------------------------------------------------------------------|-----------------|----------------------|--------------------|--------------------|--------------------|----------------|
| <b>DFDGAM-NH<sub>2</sub></b><br><br>Activity:<br>0%                          | <b>D1 alpha</b> | 0.12789              | <b>3.23 ± 0.02</b> | 1                  | -                  | -              |
|                                                                              | <b>D1 beta</b>  | 0.2635               | <b>3.19 ± 0.02</b> | 1                  | -                  | -              |
|                                                                              | F2 amide        | 0.02219              | <b>4.04 ± 0.04</b> | 1                  | -                  | -              |
|                                                                              | F2 beta 1 **    | -0.04182             | <b>3.82 ± 0.02</b> | 1                  | -                  | -              |
|                                                                              | <b>D3 alpha</b> | 0.10395              | <b>4.09 ± 0.03</b> | 1                  | -                  | -              |
|                                                                              | <b>D3 beta</b>  | 0.25764              | <b>4.13 ± 0.03</b> | 1                  | -                  | -              |
|                                                                              | <b>D3 amide</b> | 0.143935             | <b>4.11 ± 0.01</b> | 1                  | -                  | -              |
|                                                                              | G4 amide        | -0.274427            | <b>4.15 ± 0.08</b> | 0.61               | <b>3.18 ± 0.14</b> | 0.39           |
|                                                                              | A5 amide        | -0.08342             | <b>4.02 ± 0.02</b> | 0.70               | <b>2.81 ± 0.07</b> | 0.30           |
| M6 amide                                                                     | 0.03094         | <b>3.93 ± 0.02</b>   | 1                  | -                  | -                  |                |
| <b>DFDGAMPGVLRN-NH<sub>2</sub></b><br><br>Activity:<br>29.1 %                | <b>D1 alpha</b> | 0.14664              | <b>2.97 ± 0.02</b> | 0.84               | <b>4.18 ± 0.10</b> | 0.16           |
|                                                                              | F2 amide        | 0.02355              | <b>3.80 ± 0.24</b> | 1                  | -                  | -              |
|                                                                              | <b>D3 amide</b> | 0.14108              | <b>4.04 ± 0.01</b> | 1                  | -                  | -              |
|                                                                              | G4 amide        | -0.2852              | <b>4.10 ± 0.04</b> | 0.63               | <b>3.05 ± 0.07</b> | 0.36           |
|                                                                              | A5 amide        | -0.08525             | <b>3.99 ± --</b>   | 0.70               | <b>2.85 ± --</b>   | 0.30           |
|                                                                              | M6 amide        | 0.04743              | <b>4.48 ± 0.11</b> | 0.51               | <b>3.51 ± 0.10</b> | 0.49           |
|                                                                              | G8 amide        | -0.03288             | <b>4.34 ± 0.07</b> | 0.61               | <b>3.02 ± 0.12</b> | 0.39           |
|                                                                              | V9 amide        | 0.03112              | <b>3.74 ± 0.05</b> | 0.65               | <b>4.78 ± --</b>   | 0.35           |
| R11 epsilon                                                                  | -0.01513        | <b>4.21 ± 0.10</b>   | 0.54               | <b>2.84 ± 0.13</b> | 0.46               |                |
| <b>DFDGE M P G V L R F - N H <sub>2</sub></b><br><br>Activity:<br>19.0 %     | F2 amide        | -0.0074 *            | <b>4.68 ± 0.05</b> | 0.57               | <b>3.71 ± 0.04</b> | 0.43           |
|                                                                              | <b>D3 amide</b> | 0.14832              | <b>3.63 ± 0.05</b> | 0.52               | <b>4.55 ± 0.07</b> | 0.48           |
|                                                                              | G4 amide        | -0.2028              | <b>2.97 ± 0.03</b> | 0.55               | <b>3.87 ± 0.03</b> | 0.45           |
|                                                                              | <b>E5 amide</b> | -0.1611              | <b>4.59 ± 0.02</b> | 0.75               | <b>3.08 ± 0.04</b> | 0.25           |
|                                                                              | M6 amide        | -0.00707 *           | <b>4.74 ± 0.03</b> | 0.57               | <b>3.09 ± 0.03</b> | 0.43           |
|                                                                              | G8 amide        | -0.05852             | <b>4.51 ± 0.04</b> | 0.61               | <b>3.24 ± 0.05</b> | 0.39           |
|                                                                              | V9 amide        | 0.05953              | <b>3.31 ± 0.04</b> | 0.53               | <b>4.48 ± 0.05</b> | 0.47           |
|                                                                              | R11 epsilon     | -0.0414              | <b>4.53 ± 0.03</b> | 0.78               | <b>3.00 ± 0.09</b> | 0.22           |
| <b>DFDGE M S M P G V L R F - N H <sub>2</sub></b><br><br>Activity:<br>45.0 % | F2 amide        | -0.01648 *           | <b>4.59 ± 0.09</b> | 0.56               | <b>4.13 ± 0.10</b> | 0.44           |
|                                                                              | <b>D3 amide</b> | 0.14966              | <b>3.72 ± 0.05</b> | 0.54               | <b>4.62 ± 0.07</b> | 0.46           |
|                                                                              | G4 amide        | -0.20381             | <b>2.99 ± 0.08</b> | 0.50               | <b>3.74 ± 0.07</b> | 0.50           |
|                                                                              | <b>E5 amide</b> | -0.17421             | <b>4.65 ± 0.02</b> | 0.73               | <b>3.19 ± 0.05</b> | 0.27           |
|                                                                              | M6 amide        | 0.0413               | <b>3.40 ± 0.02</b> | 1                  | -                  | -              |
|                                                                              | M8 amide        | 0.05752              | <b>3.34 ± 0.05</b> | 0.65               | <b>4.62 ± 0.12</b> | 0.35           |
|                                                                              | G10 amide       | -0.0454              | <b>4.62 ± 0.05</b> | 0.59               | <b>3.24 ± 0.05</b> | 0.41           |
|                                                                              | V11 amide       | 0.05247              | <b>3.43 ± 0.04</b> | 0.53               | <b>4.69 ± 0.06</b> | 0.47           |
| R13 epsilon                                                                  | -0.0175         | <b>4.58 ± 0.04</b>   | 0.73               | <b>2.88 ± 0.11</b> | 0.27               |                |

| Peptide                                                   | Peak                  | $\Delta\delta$ (ppm) | pKa <sub>1</sub>    | c <sub>1</sub>     | pKa <sub>2</sub>   | c <sub>2</sub> |
|-----------------------------------------------------------|-----------------------|----------------------|---------------------|--------------------|--------------------|----------------|
| GFGDEM-NH <sub>2</sub><br><br>Activity:<br>0 %            | F2 amide              | -0.10392             | <b>3.51 ± 0.03</b>  | 0.80               | <b>4.43 ± 0.11</b> | 0.20           |
|                                                           | G3 amide              | -0.12881             | <b>3.52 ± 0.04</b>  | 0.51               | <b>4.45 ± 0.05</b> | 0.49           |
|                                                           | <b>D4 amide</b>       | 0.29597              | <b>3.51 ± 0.00</b>  | 1                  | -                  | -              |
|                                                           | <b>E5 amide</b>       | -0.17321             | <b>4.41 ± 0.01</b>  | 1                  | -                  | -              |
|                                                           | M6 amide              | -0.00302 *           | <b>3.30 ± 0.05</b>  | 0.52               | <b>4.50 ± 0.06</b> | 0.48           |
|                                                           | CNH <sub>2</sub> 1 ** | 0.04575              | <b>4.24 ± 0.02</b>  | 1                  |                    |                |
| GFGDEMSMPGVLRN-NH <sub>2</sub><br><br>Activity:<br>49.3 % | F2 amide              | -0.09853             | <b>3.50 ± 0.03</b>  | 0.88               | <b>4.34 ± 0.19</b> | 0.12           |
|                                                           | G3 amide              | -0.12611             | <b>3.68 ± 0.05</b>  | 0.66               | <b>4.56 ± 0.13</b> | 0.34           |
|                                                           | <b>D4 amide</b>       | 0.29564              | <b>3.47 ± 0.01</b>  | 1                  | -                  | -              |
|                                                           | <b>E5 amide</b>       | -0.20448             | <b>4.31 ± 0.01</b>  | 1                  | -                  | -              |
|                                                           | M6 amide              | 0.01312 *            | <b>4.49 ± 0.05</b>  | 0.71               | <b>2.98 ± 0.12</b> | 0.29           |
|                                                           | S7 amide              | 0.05786              | <b>3.75 ± 0.07</b>  | 0.75               | <b>5.03 ± 0.44</b> | 0.25           |
|                                                           | M8 amide              | 0.05181              | <b>3.63 ± 0.05</b>  | 0.78               | <b>5.21 ± 0.47</b> | 0.22           |
|                                                           | G10 amide             | -0.03699             | <b>4.19 ± 0.07</b>  | 0.78               | <b>2.66 ± 0.33</b> | 0.22           |
|                                                           | V11 amide             | 0.03465              | <b>3.87 ± 0.07</b>  | 0.71               | <b>5.24 ± 0.43</b> | 0.29           |
| R13 epsilon                                               | -0.01783              | <b>4.07 ± 0.02</b>   | 0.83                | <b>2.32 ± 0.24</b> | 0.17               |                |
| GFGDAMPGVLRN-NH <sub>2</sub><br><br>Activity:<br>104.8 %  | F2 amide              | -0.06875             | <b>3.46 ± 0.008</b> | 1                  | -                  | -              |
|                                                           | G3 amide              | -0.05954             | <b>3.47 ± 0.007</b> | 1                  | -                  | -              |
|                                                           | <b>D4 amide</b>       | 0.35                 | <b>3.50 ± 0.01</b>  | 1                  | -                  | -              |
|                                                           | M6 amide              | -0.01985             | <b>3.58 ± 0.06</b>  | 1                  | -                  | -              |
|                                                           | G8 amide              | -0.02524             | <b>3.51 ± 0.01</b>  | 1                  | -                  | -              |
|                                                           | R11 epsilon           | -0.00689             | <b>3.34 ± 0.03</b>  | 1                  | -                  | -              |
| EMPGVLRN-NH <sub>2</sub><br><br>Activity:<br>100 %        | <b>E1 alpha</b>       | 0.0404               | <b>3.74 ± 0.02</b>  | 1                  | -                  | -              |
|                                                           | M2 amide              | -0.0882              | <b>3.57 ± 0.02</b>  | 1                  | -                  | -              |
|                                                           | G4 amide              | -0.0491              | <b>3.65 ± 0.01</b>  | 1                  | -                  | -              |
|                                                           | V5 amide              | 0.037                | <b>3.80 ± 0.04</b>  | 1                  | -                  | -              |
|                                                           | R7 epsilon            | -0.0283              | <b>3.56 ± 0.02</b>  | 1                  | -                  | -              |

Table S2.  $^1\text{H}$  NMR assignments for all peptides examined in the current study.

All assignments in this table are for spectra obtained from samples at pH 5.5.

| Peptide                      | Amino Acid         | Resonance          | Chemical Shift (ppm) |
|------------------------------|--------------------|--------------------|----------------------|
| DFDGAM-NH <sub>2</sub>       | Asp 1              | H $\alpha$         | 4.179                |
|                              |                    | H $\beta$          | 2.652                |
|                              | Phe 2              | H $\beta$          | 2.759                |
|                              |                    | H                  | 8.828                |
|                              |                    | H $\alpha$         | 4.629                |
|                              | Asp 3              | H $\beta$          | 3.079                |
|                              |                    | H $\beta$          | 3.122                |
|                              |                    | H                  | 8.433                |
|                              | Gly 4              | H $\alpha$         | 4.543                |
|                              |                    | H $\beta$          | 2.629                |
|                              | Ala 5              | H                  | 7.991                |
|                              |                    | H $\alpha$         | 3.876                |
|                              | Met 6              | H                  | 8.250                |
|                              |                    | H $\alpha$         | 4.285                |
|                              |                    | H $\beta$          | 1.401                |
|                              |                    | H                  | 8.331                |
|                              |                    | H $\alpha$         | 4.416                |
| C-NH <sub>2</sub>            | H $\beta/\epsilon$ | 2.025              |                      |
|                              |                    | 2.110              |                      |
|                              | H $\gamma$         | 2.519              |                      |
|                              | H $\gamma$         | 2.628              |                      |
|                              | a                  | 7.510              |                      |
|                              | b                  | 7.198              |                      |
| DFDGAMPGVLRN-NH <sub>2</sub> | Asp 1              | H $\alpha$         | 4.179                |
|                              |                    | H $\beta$          | 2.737                |
|                              | Phe 2              | H                  | 8.824                |
|                              |                    | H $\alpha$         | 4.629                |
|                              |                    | H $\beta$          | 3.079                |
|                              | Asp 3              | H $\beta$          | 3.123                |
|                              |                    | H                  | 8.442                |
|                              |                    | H $\alpha$         | 4.542                |
|                              | Gly 4              | H $\beta$          | 2.627                |
|                              |                    | H                  | 7.912                |
|                              | Ala 5              | H $\alpha$         | 3.854                |
|                              |                    | H                  | 8.130                |
|                              | Met 6              | H $\alpha$         | 4.286                |
|                              |                    | H $\beta$          | 1.358                |
|                              |                    | H                  | 8.351                |
|                              |                    | H $\alpha$         | 4.758                |
|                              |                    | H $\beta/\epsilon$ | 1.940                |
|                              |                    |                    | 2.048                |
|                              |                    | H $\gamma$         | 2.543                |
|                              |                    | H $\gamma$         | 2.630                |
|                              | Pro 7              | H $\alpha$         | 4.394                |
| Gly 8                        | H                  | 8.582              |                      |
|                              | H $\alpha$         | 3.919              |                      |
| Val 9                        | H                  | 7.899              |                      |
|                              | H $\alpha$         | 4.070              |                      |
|                              | H $\beta$          | 2.068              |                      |
|                              | H $\gamma$         | 0.906              |                      |

| Peptide                                                | Amino Acid        | Resonance          | Chemical Shift (ppm) |
|--------------------------------------------------------|-------------------|--------------------|----------------------|
| DFDGAMPGVLR <sup>F</sup> -NH <sub>2</sub><br>Continued | Leu 10            | H                  | 8.375                |
|                                                        |                   | H $\alpha$         | 4.306                |
|                                                        |                   | H $\beta/\gamma$   | 1.486                |
|                                                        |                   |                    | 1.611                |
|                                                        | Arg 11            | H $\delta$         | 0.862                |
|                                                        |                   | H $\delta$         | 0.927                |
|                                                        |                   | H                  | 8.281                |
|                                                        |                   | H $\alpha$         | 4.242                |
|                                                        |                   | H $\beta$          | 1.444                |
|                                                        |                   | H $\beta$          | 1.659                |
|                                                        |                   | H $\gamma$         | 1.659                |
|                                                        |                   | H $\delta$         | 3.102                |
|                                                        | Phe 12            | H $\epsilon$       | 7.168                |
|                                                        |                   | H                  | 8.267                |
|                                                        |                   | H $\alpha$         | 4.609                |
|                                                        |                   | H $\beta$          | 2.994                |
|                                                        | C-NH <sub>2</sub> | H $\beta$          | 3.165                |
|                                                        |                   | a                  | 7.593                |
|                                                        |                   | b                  | 7.149                |
| DFDGEMPGVLR <sup>F</sup> -NH <sub>2</sub>              | Asp 1             | H $\alpha$         | 4.180                |
|                                                        |                   | H $\beta$          | 2.652                |
|                                                        | Phe 2             | H $\beta$          | 2.738                |
|                                                        |                   | H                  | 8.799                |
|                                                        |                   | H $\alpha$         | 4.630                |
|                                                        | Asp 3             | H $\beta$          | 3.079                |
|                                                        |                   | H $\beta$          | 3.123                |
|                                                        |                   | H                  | 8.468                |
|                                                        | Gly 4             | H $\alpha$         | 4.543                |
|                                                        |                   | H $\beta$          | 2.628                |
|                                                        |                   | H                  | 7.890                |
|                                                        | Glu 5             | H $\alpha$         | 3.876                |
|                                                        |                   | H                  | 8.209                |
|                                                        |                   | H $\alpha$         | 4.263                |
|                                                        |                   | H $\beta$          | 1.874                |
|                                                        |                   | H $\beta$          | 2.014                |
|                                                        | Met 6             | H $\gamma$         | 2.218                |
|                                                        |                   | H $\gamma$         | 2.260                |
|                                                        |                   | H                  | 8.516                |
|                                                        |                   | H $\alpha$         | 4.759                |
|                                                        |                   | H $\beta/\epsilon$ | 1.952                |
|                                                        | Pro 7             |                    | 2.048                |
|                                                        |                   | H $\gamma$         | 2.541                |
|                                                        |                   | H $\gamma$         | 2.606                |
|                                                        | Gly 8             | H $\alpha$         | 4.395                |
|                                                        |                   | H                  | 8.614                |
|                                                        |                   | H $\alpha$         | 3.900                |
| Val 9                                                  | H $\alpha$        | 3.943              |                      |
|                                                        | H                 | 7.876              |                      |
|                                                        | H $\alpha$        | 4.070              |                      |
|                                                        | H $\beta$         | 2.068              |                      |

| Peptide                                                | Amino Acid         | Resonance          | Chemical Shift (ppm) |
|--------------------------------------------------------|--------------------|--------------------|----------------------|
| DFDGEMPGVLR <sup>F</sup> -NH <sub>2</sub><br>Continued | Leu 10             | H $\gamma$         | 0.905                |
|                                                        |                    | H                  | 8.358                |
|                                                        |                    | H $\alpha$         | 4.328                |
|                                                        |                    | H $\beta/\gamma$   | 1.487                |
|                                                        |                    |                    | 1.617                |
|                                                        |                    |                    | 0.862                |
|                                                        | Arg 11             | H $\delta$         | 0.927                |
|                                                        |                    | H                  | 8.296                |
|                                                        |                    | H $\alpha$         | 4.241                |
|                                                        |                    | H $\beta/\gamma$   | 1.402                |
|                                                        |                    |                    | 1.465                |
|                                                        |                    |                    | 1.659                |
|                                                        | Phe 12             | H $\delta$         | 3.101                |
|                                                        |                    | H $\epsilon$       | 7.195                |
|                                                        |                    | H                  | 8.274                |
|                                                        |                    | H $\alpha$         | 4.608                |
|                                                        |                    | H $\beta$          | 2.993                |
|                                                        | C-NH <sub>2</sub>  | H $\beta$          | 3.166                |
| a                                                      |                    | 7.581              |                      |
|                                                        | b                  | 7.148              |                      |
| DFDGEMSPGVLR <sup>F</sup> -NH <sub>2</sub>             | Asp 1              | H $\alpha$         | 4.180                |
|                                                        |                    | H $\beta$          | 2.662                |
|                                                        | Phe 2              | H $\beta$          | 2.759                |
|                                                        |                    | H                  | 8.801                |
|                                                        |                    | H $\alpha$         | 4.611                |
|                                                        | Asp 3              | H $\beta$          | 3.082                |
|                                                        |                    | H $\beta$          | 3.125                |
|                                                        |                    | H                  | 8.470                |
|                                                        | Gly 4              | H $\alpha$         | 4.546                |
|                                                        |                    | H $\beta$          | 2.631                |
|                                                        |                    | H                  | 7.980                |
|                                                        | Glu 5              | H $\alpha$         | 3.901                |
|                                                        |                    | H                  | 8.284                |
|                                                        |                    | H $\alpha$         | 4.244                |
|                                                        | Met 6              | H $\beta$          | 1.919                |
|                                                        |                    | H $\beta$          | 2.047                |
|                                                        |                    | H $\gamma$         | 2.286                |
|                                                        |                    | H                  | 8.438                |
|                                                        |                    | H $\alpha$         | 4.482                |
|                                                        |                    | H $\beta/\epsilon$ | 2.006                |
|                                                        | Ser 7              |                    | 2.093                |
|                                                        |                    | H $\gamma$         | 2.501                |
|                                                        |                    | H $\gamma$         | 2.608                |
|                                                        |                    | H                  | 8.317                |
|                                                        | Met 8              | H $\alpha$         | 4.417                |
|                                                        |                    | H $\beta$          | 3.835                |
|                                                        |                    | H                  | 8.335                |
| H $\alpha$                                             |                    | 4.803              |                      |
|                                                        | H $\beta/\epsilon$ | 1.942              |                      |

| Peptide                                                  | Amino Acid | Resonance | Chemical Shift (ppm) |       |
|----------------------------------------------------------|------------|-----------|----------------------|-------|
| DFDGEMSMPGVLR <sup>F</sup> -NH <sub>2</sub><br>Continued |            | Hβ/ε      | 2.071                |       |
|                                                          |            | Hγ        | 2.545                |       |
|                                                          |            | Hγ        | 2.609                |       |
|                                                          |            | Pro 9     | Hα                   | 4.395 |
|                                                          |            |           | Hβ                   | 1.921 |
|                                                          |            | Gly 10    | Hβ                   | 2.071 |
|                                                          |            |           | H                    | 8.610 |
|                                                          |            |           | Hα                   | 3.879 |
|                                                          |            | Val 11    | Hα                   | 3.965 |
|                                                          |            |           | H                    | 7.883 |
|                                                          |            |           | Hα                   | 4.073 |
|                                                          |            |           | Hβ                   | 2.071 |
|                                                          |            | Leu 12    | Hγ                   | 0.909 |
|                                                          |            |           | H                    | 8.374 |
|                                                          |            |           | Hα                   | 4.331 |
|                                                          |            |           | Hβ/γ                 | 1.488 |
|                                                          |            |           |                      | 1.619 |
|                                                          |            |           |                      | 1.619 |
|                                                          |            | Arg 13    | Hδ                   | 0.866 |
|                                                          |            |           | Hδ                   | 0.930 |
|                                                          |            |           | H                    | 8.295 |
|                                                          |            |           | Hα                   | 4.243 |
|                                                          |            |           | Hβ/γ                 | 1.402 |
|                                                          |            |           |                      | 1.468 |
|                                                          |            | Phe 14    |                      | 1.662 |
|                                                          |            |           | Hδ                   | 3.103 |
|                                                          |            |           | Hε                   | 7.173 |
| H                                                        | 8.282      |           |                      |       |
| Hα                                                       | 4.611      |           |                      |       |
| C-NH <sub>2</sub>                                        | Hβ         | 2.995     |                      |       |
|                                                          | Hβ         | 3.168     |                      |       |
|                                                          | a          | 7.585     |                      |       |
|                                                          | b          | 7.149     |                      |       |
| GFGDEM-NH <sub>2</sub>                                   |            | Hα        | 3.769                |       |
|                                                          |            | Hα        | 3.810                |       |
|                                                          |            | Phe 2     | H                    | 8.803 |
|                                                          |            |           | Hα                   | 4.542 |
|                                                          |            | Gly 3     | Hβ                   | 3.078 |
|                                                          |            |           | H                    | 8.698 |
|                                                          |            |           | Hα                   | 3.722 |
|                                                          |            | Asp 4     | Hα                   | 3.961 |
|                                                          |            |           | H                    | 8.049 |
|                                                          |            |           | Hα                   | 4.585 |
|                                                          |            | Glu 5     | Hβ                   | 2.690 |
|                                                          |            |           | H                    | 8.658 |
|                                                          |            |           | Hα                   | 4.240 |
|                                                          |            |           | Hβ                   | 1.977 |
|                                                          |            | Met 6     | Hβ                   | 2.068 |
|                                                          |            |           | Hγ                   | 2.303 |
|                                                          |            |           | H                    | 8.408 |



| Peptide                                     | Amino Acid       | Resonance          | Chemical Shift (ppm) |
|---------------------------------------------|------------------|--------------------|----------------------|
| GFGDEM-NH <sub>2</sub><br>Continued         | CNH <sub>2</sub> | H $\alpha$         | 4.433                |
|                                             |                  | H $\beta/\epsilon$ | 2.022                |
|                                             |                  |                    | 2.109                |
|                                             |                  | H $\gamma$         | 2.496                |
|                                             |                  | H $\gamma$         | 2.615                |
|                                             |                  | a<br>b             | 7.565<br>7.184       |
| GFGDEMSMPGVLR <sub>F</sub> -NH <sub>2</sub> | Gly 1            | H $\alpha$         | 3.765                |
| Phe 2                                       |                  | H $\alpha$         | 3.809                |
|                                             |                  | H                  | 8.801                |
|                                             |                  | H $\alpha$         | 4.562                |
|                                             |                  | H $\beta$          | 3.055                |
| Gly 3                                       |                  | H $\beta$          | 3.120                |
|                                             |                  | H                  | 8.695                |
|                                             |                  | H $\alpha$         | 3.746                |
| Asp 4                                       |                  | H $\alpha$         | 3.959                |
|                                             |                  | H                  | 8.047                |
|                                             |                  | H $\alpha$         | 4.584                |
| Glu 5                                       |                  | H $\beta$          | 2.690                |
|                                             |                  | H                  | 8.662                |
|                                             |                  | H $\alpha$         | 4.240                |
|                                             |                  | H $\beta$          | 1.958                |
| Met 6                                       |                  | H $\beta$          | 2.065                |
|                                             |                  | H $\gamma$         | 2.298                |
|                                             |                  | H                  | 8.387                |
|                                             |                  | H $\alpha$         | 4.477                |
|                                             |                  | H $\beta/\epsilon$ | 2.025                |
|                                             |                  |                    | 2.090                |
| Ser 7                                       |                  | H $\gamma$         | 2.507                |
|                                             |                  | H $\gamma$         | 2.604                |
|                                             |                  | H                  | 8.263                |
| Met 8                                       |                  | H $\alpha$         | 4.433                |
|                                             |                  | H $\beta$          | 3.852                |
|                                             |                  | H                  | 8.325                |
|                                             |                  | H $\alpha$         | 4.799                |
| Pro 9                                       |                  | H $\beta/\epsilon$ | 1.958                |
|                                             |                  |                    | 2.066                |
|                                             |                  | H $\gamma$         | 2.539                |
|                                             |                  | H $\gamma$         | 2.626                |
|                                             |                  | H $\alpha$         | 4.390                |
| Gly 10                                      |                  | H $\beta$          | 1.917                |
|                                             |                  | H $\beta$          | 2.065                |
|                                             |                  | H                  | 8.606                |
| Val 11                                      |                  | H $\alpha$         | 3.894                |
|                                             |                  | H $\alpha$         | 3.960                |
|                                             |                  | H                  | 7.897                |
|                                             |                  | H $\alpha$         | 4.067                |
| Leu 12                                      |                  | H $\beta$          | 2.066                |
|                                             |                  | H $\gamma$         | 0.903                |
|                                             |                  | H                  | 8.373                |
|                                             |                  | H $\alpha$         | 4.326                |

| Peptide                                                  | Amino Acid | Resonance         | Chemical Shift (ppm) |       |
|----------------------------------------------------------|------------|-------------------|----------------------|-------|
| GFGDEMSMPGVLR <sup>F</sup> -NH <sub>2</sub><br>Continued |            | Hβ/γ              | 1.485                |       |
|                                                          |            |                   | 1.614                |       |
|                                                          |            | Hδ                | 0.861                |       |
|                                                          |            | Hδ                | 0.926                |       |
|                                                          |            | Arg 13            | H                    | 8.290 |
|                                                          |            |                   | Hα                   | 4.239 |
|                                                          |            |                   | Hβ/γ                 | 1.416 |
|                                                          |            |                   |                      | 1.463 |
|                                                          |            |                   |                      | 1.656 |
|                                                          |            | Phe 14            | Hδ                   | 3.098 |
|                                                          |            |                   | Hε                   | 7.172 |
|                                                          |            |                   | H                    | 8.279 |
|                                                          |            |                   | Hα                   | 4.606 |
|                                                          |            |                   | Hβ                   | 2.990 |
|                                                          |            | C-NH <sub>2</sub> | Hβ                   | 3.164 |
|                                                          |            |                   | a                    | 7.588 |
|                                                          |            |                   | b                    | 7.149 |
| GFGDAMPGVLR <sup>F</sup> -NH <sub>2</sub>                | Gly 1      | Hα                | 3.833                |       |
|                                                          |            |                   |                      |       |
|                                                          | Phe 2      | H                 | 8.797                |       |
|                                                          |            | Hα                | 4.541                |       |
|                                                          | Gly 3      | Hβ                | 3.078                |       |
|                                                          |            | H                 | 8.623                |       |
|                                                          |            | Hα                | 3.723                |       |
|                                                          |            | Hα                | 3.916                |       |
|                                                          | Asp 4      | H                 | 7.936                |       |
|                                                          |            | Hα                | 4.541                |       |
|                                                          | Ala 5      | Hβ                | 2.647                |       |
|                                                          |            | H                 | 8.354                |       |
|                                                          |            | Hα                | 4.283                |       |
|                                                          | Met 6      | Hβ                | 1.356                |       |
|                                                          |            | H                 | 8.405                |       |
|                                                          |            | Hα                | 4.756                |       |
|                                                          | Pro 7      | Hβ/ε              | 1.937                |       |
|                                                          |            |                   | 2.066                |       |
|                                                          |            | Hγ                | 2.539                |       |
|                                                          |            | Hγ                | 2.625                |       |
|                                                          |            | Hα                | 4.402                |       |
|                                                          |            | Hβ                | 1.938                |       |
|                                                          |            | Hβ                | 2.068                |       |
|                                                          | Gly 8      | H                 | 8.573                |       |
|                                                          |            | Hα                | 3.918                |       |
|                                                          | Val 9      | H                 | 7.931                |       |
|                                                          |            | Hα                | 4.067                |       |
|                                                          |            | Hβ                | 2.065                |       |
|                                                          | Leu 10     | Hγ                | 0.904                |       |
| H                                                        |            | 8.378             |                      |       |
| Hα                                                       |            | 4.325             |                      |       |
| Hβ/γ                                                     |            | 1.482             |                      |       |
|                                                          |            | 1.614             |                      |       |
|                                                          | Hδ         | 0.861             |                      |       |
|                                                          | Hδ         | 0.925             |                      |       |

| Peptide                                                | Amino Acid        | Resonance          | Chemical Shift (ppm) |
|--------------------------------------------------------|-------------------|--------------------|----------------------|
| GFGDAMPGVLR <sup>F</sup> -NH <sub>2</sub><br>Continued | Arg 11            | H                  | 8.289                |
|                                                        |                   | H $\alpha$         | 4.240                |
|                                                        |                   | H $\beta/\gamma$   | 1.356                |
|                                                        |                   |                    | 1.420                |
|                                                        |                   |                    | 1.657                |
|                                                        | Phe 12            | H $\delta$         | 3.119                |
|                                                        |                   | H $\epsilon$       | 7.167                |
|                                                        |                   | H                  | 8.273                |
|                                                        |                   | H $\alpha$         | 4.606                |
|                                                        |                   | H $\beta$          | 2.991                |
|                                                        | C-NH <sub>2</sub> | H $\beta$          | 3.164                |
|                                                        |                   | a                  | 7.600                |
|                                                        |                   | b                  | 7.147                |
| EMPGVLR <sup>F</sup> -NH <sub>2</sub>                  | Glu 1             | H                  | 4.046                |
|                                                        | Met 2             | H                  | 8.997                |
|                                                        |                   | H $\alpha$         | 4.843                |
|                                                        |                   | H $\beta/\epsilon$ | 1.980                |
|                                                        |                   |                    | 2.110                |
|                                                        |                   |                    | 2.605                |
|                                                        | Pro 3             | H $\gamma$         | 2.669                |
|                                                        |                   | H $\alpha$         | 4.434                |
|                                                        |                   | H                  | 8.576                |
|                                                        | Gly 4             | H $\alpha$         | 3.938                |
|                                                        |                   | H                  | 7.918                |
|                                                        | Val 5             | H $\alpha$         | 4.068                |
|                                                        |                   | H $\beta$          | 2.066                |
|                                                        |                   | H $\gamma$         | 0.925                |
|                                                        | Leu 6             | H                  | 8.354                |
|                                                        |                   | H $\alpha$         | 4.326                |
|                                                        |                   | H $\beta/\gamma$   | 1.486                |
|                                                        |                   |                    | 1.614                |
|                                                        |                   |                    | 0.861                |
|                                                        | Arg 7             | H $\delta$         | 0.926                |
|                                                        |                   | H                  | 8.281                |
|                                                        |                   | H $\alpha$         | 4.240                |
|                                                        |                   | H $\beta/\gamma$   | 1.421                |
|                                                        |                   |                    | 1.485                |
|                                                        |                   |                    | 1.657                |
|                                                        |                   |                    | 3.120                |
|                                                        | Phe 8             | H $\epsilon$       | 7.178                |
| H                                                      |                   | 8.261              |                      |
| H $\alpha$                                             |                   | 4.607              |                      |
| H $\beta$                                              |                   | 2.992              |                      |
| H $\beta$                                              |                   | 3.186              |                      |
| C-NH <sub>2</sub>                                      | a                 | 7.587              |                      |
|                                                        | b                 | 7.135              |                      |
| SGSGAMPGVLR <sup>F</sup> -NH <sub>2</sub>              | Gly 2             | H                  | 8.824                |
|                                                        |                   | H $\alpha$         | 4.091                |
| Ser 3                                                  | H                 | 8.552              |                      |
|                                                        | H $\alpha$        | 4.479              |                      |
|                                                        | H $\beta$         | 3.933              |                      |

| Peptide                                                | Amino Acid | Resonance          | Chemical Shift (ppm) |
|--------------------------------------------------------|------------|--------------------|----------------------|
| SGSGAMPGVLR <sup>F</sup> -NH <sub>2</sub><br>Continued | Gly 4      | H                  | 8.560                |
|                                                        |            | H $\alpha$         | 3.941                |
|                                                        | Ala 5      | H                  | 8.208                |
|                                                        |            | H $\alpha$         | 4.306                |
|                                                        |            | H $\beta$          | 1.336                |
|                                                        |            | H $\gamma$         | 2.563                |
|                                                        | Met 6      | H                  | 8.482                |
|                                                        |            | H $\alpha$         | 4.780                |
|                                                        |            | H $\beta/\epsilon$ | 1.961                |
|                                                        |            | H $\gamma$         | 2.068                |
|                                                        |            | H $\gamma$         | 2.649                |
|                                                        | Pro 7      | H $\alpha$         | 4.414                |
|                                                        | Gly 8      | H                  | 8.560                |
|                                                        |            | H $\alpha$         | 3.941                |
|                                                        | Val 9      | H                  | 7.966                |
|                                                        |            | H $\alpha$         | 4.070                |
|                                                        |            | H $\beta$          | 2.068                |
|                                                        |            | H $\gamma$         | 0.905                |
|                                                        | Leu 10     | H                  | 8.391                |
|                                                        |            | H $\alpha$         | 4.328                |
|                                                        |            | H $\beta/\gamma$   | 1.486                |
|                                                        |            | H $\delta$         | 1.595                |
|                                                        |            | H $\delta$         | 0.863                |
|                                                        | Arg 11     | H $\delta$         | 0.927                |
|                                                        |            | H                  | 8.297                |
|                                                        |            | H $\alpha$         | 4.241                |
|                                                        |            | H $\beta/\gamma$   | 1.463                |
|                                                        |            | H $\delta$         | 1.658                |
|                                                        | Phe 12     | H $\delta$         | 3.122                |
|                                                        |            | H $\epsilon$       | 7.166                |
| H                                                      |            | 8.281              |                      |
| H $\alpha$                                             |            | 4.608              |                      |
| H $\beta$                                              |            | 2.995              |                      |
| C-NH <sub>2</sub>                                      | H $\beta$  | 3.166              |                      |
|                                                        | a          | 7.607              |                      |
|                                                        | b          | 7.150              |                      |
| AAAAAMP <sup>G</sup> VLR <sup>F</sup> -NH <sub>2</sub> | Ala 1      | H $\alpha$         | 4.073                |
|                                                        |            | H                  | 8.659                |
|                                                        | Ala 2      | H $\alpha$         | 4.317                |
|                                                        |            | H $\beta$          | 1.379                |
|                                                        |            | H                  | 8.518                |
|                                                        | Ala 3      | H $\alpha$         | 4.263                |
|                                                        |            | H $\beta$          | 1.379                |
|                                                        |            | H                  | 8.395                |
|                                                        | Ala 4      | H $\alpha$         | 4.262                |
|                                                        |            | H $\beta$          | 1.368                |
|                                                        |            | H                  | 8.359                |
|                                                        | Ala 5      | H $\alpha$         | 4.286                |
|                                                        |            | H $\beta$          | 1.357                |
|                                                        |            | H                  | 8.443                |
|                                                        | Met 6      | H                  | 8.443                |
| H $\alpha$                                             |            | 4.780              |                      |

| Peptide                                  | Amino Acid | Resonance         | Chemical Shift (ppm) |       |
|------------------------------------------|------------|-------------------|----------------------|-------|
| AAAAAMPGLRF-NH <sub>2</sub><br>Continued |            | Hβ/ε              | 1.939                |       |
|                                          |            |                   | 2.068                |       |
|                                          |            | Hγ                | 2.563                |       |
|                                          |            | Hγ                | 2.650                |       |
|                                          |            | Pro 7             | Hα                   | 4.418 |
|                                          |            |                   | Hβ                   | 1.943 |
|                                          |            | Gly 8             | Hβ                   | 2.072 |
|                                          |            |                   | H                    | 8.554 |
|                                          |            | Val 9             | Hα                   | 3.940 |
|                                          |            |                   | H                    | 7.964 |
|                                          |            | Leu 10            | Hα                   | 4.070 |
|                                          |            |                   | Hβ                   | 2.068 |
|                                          |            |                   | Hγ                   | 0.904 |
|                                          |            |                   | H                    | 8.386 |
|                                          |            |                   | Hα                   | 4.328 |
|                                          |            |                   | Hβ/γ                 | 1.486 |
|                                          |            | Arg 11            |                      | 1.617 |
|                                          |            |                   | Hδ                   | 0.862 |
|                                          |            |                   | Hδ                   | 0.928 |
|                                          |            |                   | H                    | 8.298 |
|                                          |            |                   | Hα                   | 4.242 |
|                                          |            |                   | Hβ/γ                 | 1.422 |
|                                          |            | Phe 12            |                      | 1.659 |
|                                          |            |                   | Hδ                   | 3.122 |
|                                          |            |                   | Hε                   | 7.168 |
|                                          |            |                   | H                    | 8.282 |
|                                          |            |                   | Hα                   | 4.608 |
|                                          |            | C-NH <sub>2</sub> | Hβ                   | 2.994 |
| Hβ                                       | 3.165      |                   |                      |       |
| a                                        | 7.604      |                   |                      |       |
| b                                        | 7.147      |                   |                      |       |
| PGVLRN-NH <sub>2</sub>                   | Pro 1      | H                 | 9.090                |       |
|                                          |            | H                 | 8.410                |       |
|                                          |            | Hα                | 4.436                |       |
|                                          |            | Hβ/γ              | 2.456                |       |
|                                          |            |                   | 2.069                |       |
|                                          |            | Gly 2             | Hδ                   | 3.404 |
|                                          |            |                   | H                    | 8.745 |
|                                          |            |                   | Hα                   | 3.995 |
|                                          |            | Val 3             | Hα                   | 4.050 |
|                                          |            |                   | H                    | 8.291 |
|                                          |            |                   | Hα                   | 4.092 |
|                                          |            | Leu 4             | Hβ                   | 2.025 |
|                                          |            |                   | Hγ                   | 0.906 |
|                                          |            |                   | H                    | 8.447 |
|                                          |            |                   | Hα                   | 4.329 |
|                                          |            |                   | Hβ/γ                 | 1.466 |
|                                          |            | Arg 5             |                      | 1.595 |
|                                          |            |                   | Hδ                   | 0.863 |
|                                          |            |                   | Hδ                   | 0.928 |
| H                                        | 8.371      |                   |                      |       |

| Peptide                             | Amino Acid       | Resonance         | Chemical Shift (ppm) |       |
|-------------------------------------|------------------|-------------------|----------------------|-------|
| PGVLRN-NH <sub>2</sub><br>Continued |                  | H $\alpha$        | 4.264                |       |
|                                     |                  | H $\beta/\gamma$  | 1.442                |       |
|                                     |                  |                   | 1.509                |       |
|                                     |                  |                   | 1.661                |       |
|                                     |                  |                   | 3.123                |       |
|                                     |                  |                   | 7.167                |       |
|                                     |                  | Phe 6             | H                    | 8.318 |
|                                     |                  |                   | H $\alpha$           | 4.608 |
|                                     |                  | C-NH <sub>2</sub> | H $\beta$            | 2.994 |
|                                     |                  |                   | H $\beta$            | 3.166 |
|                                     |                  |                   | a                    | 7.632 |
|                                     |                  |                   | b                    | 7.136 |
|                                     |                  |                   |                      |       |
| PGVLRNPGVLRN-NH <sub>2</sub>        | Pro 1            | H                 | 9.090                |       |
|                                     |                  | H                 | 8.413                |       |
|                                     |                  | H $\alpha$        | 4.434                |       |
|                                     |                  | H $\beta/\gamma$  | 2.066                |       |
|                                     |                  |                   | 2.453                |       |
|                                     |                  | Gly 2             | H $\delta$           | 3.410 |
|                                     |                  |                   | H                    | 8.746 |
|                                     |                  |                   | H $\alpha$           | 3.982 |
|                                     |                  | Val 3             | H $\alpha$           | 4.046 |
|                                     |                  |                   | H                    | 8.287 |
|                                     |                  |                   | H $\alpha$           | 4.079 |
|                                     |                  |                   | H $\beta$            | 2.014 |
|                                     |                  | Leu 4             | H $\gamma$           | 0.903 |
| H                                   | 8.438            |                   |                      |       |
| H $\alpha$                          | 4.326            |                   |                      |       |
| H $\beta/\gamma$                    | 1.442            |                   |                      |       |
|                                     | 1.570            |                   |                      |       |
| Arg 5                               | H $\delta$       | 0.839             |                      |       |
|                                     | H $\delta$       | 0.925             |                      |       |
|                                     | H                | 8.327             |                      |       |
|                                     | H $\alpha$       | 4.240             |                      |       |
|                                     | H $\beta/\gamma$ | 1.420             |                      |       |
|                                     |                  | 1.507             |                      |       |
|                                     |                  | 1.636             |                      |       |
| Phe 6                               | H $\delta$       | 3.119             |                      |       |
|                                     | H $\epsilon$     | 7.205             |                      |       |
|                                     | H                | 8.403             |                      |       |
|                                     | H $\alpha$       | 4.326             |                      |       |
|                                     | H $\beta$        | 2.927             |                      |       |
| Pro 7                               | H $\beta$        | 3.142             |                      |       |
|                                     | H1 $\alpha$      | 3.767             |                      |       |
|                                     | H2 $\alpha$      | 3.595             |                      |       |
| Gly 8                               | H1               | 8.610             |                      |       |
|                                     | H1 $\alpha$      | 3.874             |                      |       |
|                                     | H2               | 8.115             |                      |       |
|                                     | H2 $\alpha$      | 3.938             |                      |       |
| Val 9                               | H1               | 8.094             |                      |       |
|                                     | H2               | 8.054             |                      |       |
|                                     | H1 $\alpha$      | 4.068             |                      |       |

| Peptide                     | Amino Acid        | Resonance        | Chemical Shift (ppm) |
|-----------------------------|-------------------|------------------|----------------------|
| PGVLRFPGLRF-NH <sub>2</sub> |                   | H1 $\alpha$      | 4.068                |
| Continued                   |                   | H2 $\alpha$      | 4.088                |
|                             |                   | H1 $\beta$       | 2.023                |
|                             |                   | H2 $\beta$       | 2.068                |
|                             |                   | H1 $\gamma$      | 0.882                |
|                             |                   | H2 $\gamma$      | 0.925                |
|                             | Leu 10            | H                | 8.403                |
|                             |                   | H $\alpha$       | 4.326                |
|                             |                   | H $\beta/\gamma$ | 1.464                |
|                             |                   |                  | 1.605                |
|                             |                   | H $\delta$       | 0.839                |
|                             |                   | H $\delta$       | 0.904                |
|                             | Arg 11            | H                | 8.300                |
|                             |                   | H $\alpha$       | 4.239                |
|                             |                   | H $\beta/\gamma$ | 1.420                |
|                             |                   |                  | 1.466                |
|                             |                   |                  | 1.657                |
|                             |                   | H $\delta$       | 3.111                |
|                             |                   | H $\epsilon$     | 7.169                |
|                             | Phe 12            | H                | 8.279                |
|                             |                   | H $\alpha$       | 4.606                |
|                             |                   | H $\beta$        | 2.991                |
|                             |                   | H $\beta$        | 3.164                |
|                             | C-NH <sub>2</sub> | a                | 7.614                |
|                             |                   | b                | 7.154                |
